# Supplementary material for: Genetically engineered gas vesicle proteins with proliferative potential for synergistic targeted tumor therapy
Source: Royal Society of Chemistry journal article supplement (doi:10.1039/d4ra07532c), 2025-01-01
Supplement: d4ra07532c3.pdf [file d4ra07532c3.pdf]

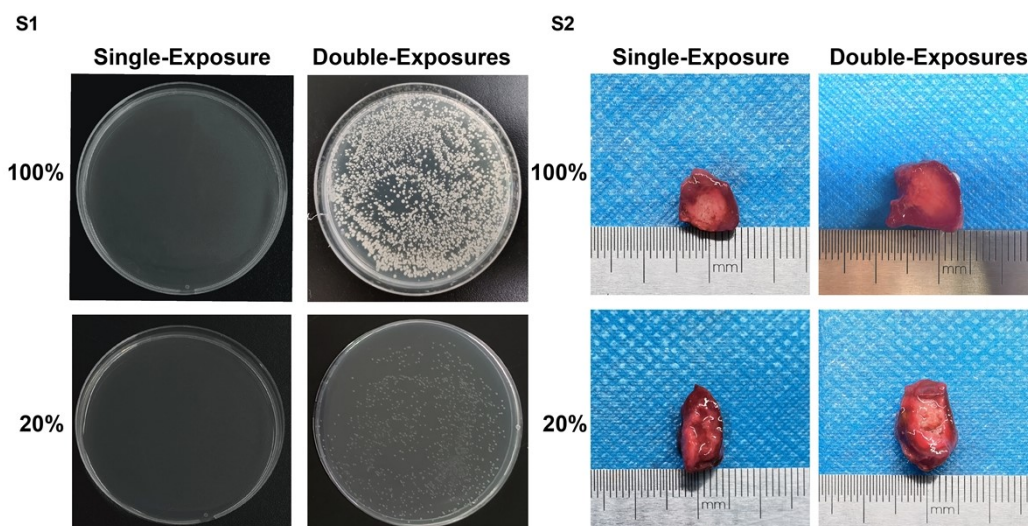

Genetically Engineered Targeting for Double Exposure(s1) The remaining viable GVs-E in the tumor after single exposure.(s2) Tumor TTC staining after double exposure.
