# Supplementary figures and images for: Genetically engineered gas vesicle proteins with proliferative potential for synergistic targeted tumor therapy
Source: Royal Society of Chemistry journal article supplement (doi:10.1039/d4ra07532c), 2025-01-01

S1

Single-Exposure

Double-Exposures

100%

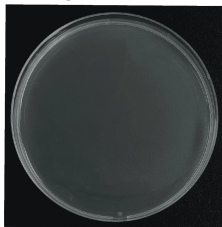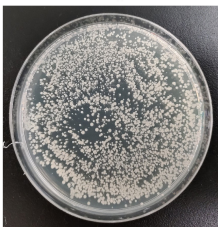

20%

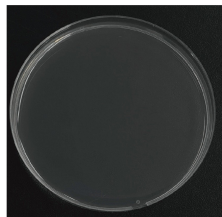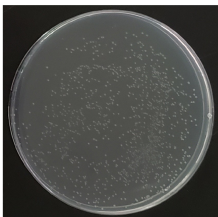

S2

Single-Exposure

Double-Exposures

100%

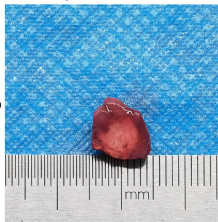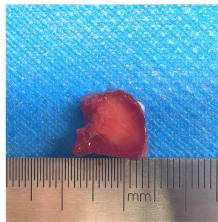

20%

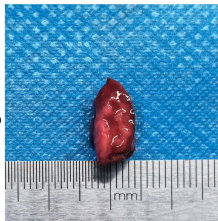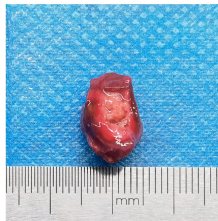

Supplement: d4ra07532c2.pdf [file d4ra07532c2.pdf]
